# Supplementary material for: Protective Effects of Sodium Nitroprusside on Photosynthetic Performance of Sorghum bicolor L. under Salt Stress
Source: MDPI journal article supplement (doi:10.3390/plants12040832), 2023-02-13
Supplement: s1 [file s1]

## Supplementary materials

Table S1. Description of the selected JIP test parameters.

|              |                                                                                                                       |
|--------------|-----------------------------------------------------------------------------------------------------------------------|
| ABS/RC       | Absorption flux (of antenna chlorophylls) per reaction center (RC)                                                    |
| ETo/RC       | Electron transport flux (further than $Q_A^-$ ) per RC                                                                |
| REo/RC       | Electron flux reducing end electron acceptors at the PSI acceptor side per RC                                         |
| TRo/RC       | Trapping flux (leading to $Q_A$ reduction) per RC                                                                     |
| $\phi_{Po}$  | Maximum quantum yield of primary photochemistry (at $t = 0$ )                                                         |
| RC/ABS       | Number of $Q_A$ -reducing RCs (i.e., active) per PSII antenna chlorophyll                                             |
| $V_j$        | Relative variable fluorescence at J step                                                                              |
| $W_k$        | Ratio of the K phase to the J phase                                                                                   |
| $PI_{ABS}$   | Performance index (potential) for energy conservation from exciton to the reduction of intersystem electron acceptors |
| $PI_{total}$ | Performance index (potential) for energy conservation from exciton to the reduction of PSI end acceptors              |
